# Supplementary material for: The highest-elevation frog provides insights into mechanisms and evolution of defenses against high UV radiation
Source: PubMed Central journal article supplement — Proc Natl Acad Sci U S A. 2022 Nov 8;119(46):e2212406119. doi: 10.1073/pnas.2212406119 (PMC9674958; doi:10.1073/pnas.2212406119), 2022-11-08
Supplement: pnas.2212406119.sapp.pdf [file pnas.2212406119.sapp.pdf]

## **Supplementary Information for**

The highest-elevation frog provides insights into mechanisms and evolution of defenses against high ultraviolet radiation

Ting-Ting Fu, Yan-Bo Sun, Wei Gao, Cheng-Bo Long, Chun-Hua Yang, Xin-Wang Yang, Yi Zhang, Xin-Qiang Lan, Song Huang, Jie-Qiong Jin, Robert W. Murphy, Yun Zhang, Ren Lai, David M. Hillis, Ya-Ping Zhang, Jing Che

Yun Zhang, Ren Lai, David M. Hillis, Ya-Ping Zhang, Jing Che jointly directed this work. Correspondence should be addressed to J.C. (chej@mail.kiz.ac.cn), Y.-P.Z. (zhangyp@mail.kiz.ac.cn), D.M.H. (dhillis@austin.utexas.edu), R.L. (rlai@mail.kiz.ac.cn), Y.Z. (zhangy@mail.kiz.ac.cn).

### **This PDF file includes:**

- Supplementary text
- References
- Figures S1 to S16
- Tables S1 to S11
- Legends for Datasets S1 to S10

### **Other supplementary materials for this manuscript include the following:**

- Datasets S1 to S10

## Supplementary Text

### Genome sequencing and assembly of *N. parkeri*

Briefly, genomic DNA was extracted from liver with QIAGEN® Genomic DNA extraction kit. Total RNA was extracted from each of tissues above using TRIzol reagent (Invitrogen Corp., Carlsbad, CA) and RNeasy Mini Kit (Qiagen, Chatsworth, CA). For long-read sequencing, SMRTbell libraries with fragment size of 20 kb were constructed with SMRTBell template preparation kit 1.0 (Pacific Biosciences, Menlo Park, CA, USA). The libraries were sequenced by the PacBio Sequel system (Pacific Biosciences) with 25 SMRT cells. short-read sequencing data were obtained based on a paired-end library with short insert sizes of about 350 bp. Three Hi-C libraries were prepared following the standard Hi-C library protocol. Then we used BGISEQ-500 platform to sequence the libraries with paired-end 100 bp reads. For transcriptome sequencing, a single pooled RNA sample was prepared by mixing equal volumes of the RNA extracted from each tissue. Total RNA was synthesized to the cDNA using Clontech SMARTer PCR cDNA Synthesis Kit. The DNA was used for SMRTbell library construction. Qualified sequencing data were obtained by sequencing this library using PacBio Sequel platform. To obtain consensus full-length isoforms, we performed SMRT analysis through Reads of insert, Classify, Cluster, and Quiver.

Based on 328.62 Gb clean short-read sequencing data, the genome size of *N. parkeri* was estimated to be 2.47 Gb through the k-mer ( $k = 17$ ) depth frequency distribution analysis. In total, we generated 237.27 Gb of PacBio long-read data (21.25 million reads) with N50 > 17 Kb for most cells. The preliminary assembled genome was approximately 2.46 Gb in size and contig N50 was 2.32 Mb (Table S2). After polishing the primary assembly using both PacBio long-read data and BGISEQ short-read data, we assembled a 2.47 Gb genome of *N. parkeri*, with a contig N50 of 2.34 Mb. Assessment of the genome quality using BUSCO (1) showed that the assembly included 93.5% of the orthologue genes, including 87.9% of the complete and 5.6% fragmented genes (Table S3). Approximately 394.87 Gb clean data were generated from the Hi-C libraries. We then constructed a chromosome-level scaffold genome with these data using Lachesis. Finally, we obtained 13 pseudo-chromosomes, which is the first chromosome-level high-elevation amphibian genome with scaffold N50 of 268.57 Mb (Table S4). Our chromosome-level assembly of *N. parkeri* genome was more than 250 times better both in contig and scaffold N50 than the previous assembly version, which used only Illumina data (contig N50: 2.34 Mb versus 8.1 Kb, scaffold N50: 268.57 Mb versus 1.05 Mb), and resulted in a larger assembled genome size (2.47 Gb versus 2.1 Gb). In addition, compared to other published genomes of anurans frogs, our *N. parkeri* genome assembly exhibited the highest contig N50 and the third highest scaffold N50 (just smaller than *Leptobranchium leishanense* and *L. ailaonicum*; Table S5).

### Genome annotation of *N. parkeri*.

In total, 1.46 Gb of repetitive sequences were identified in the *N. parkeri* genome using combined structure-based and homology-based methods, accounting for 58.90% of the genome. Most of the repeated sequences were transposable elements (TEs), occupying 55.20% (1.36 Gb) of the assembly (Table S8). We identified four major types of TEs, which were 574.37 Mb of DNA transposons (23.23% of the genome), 622.33 Mb of long interspersed nuclear elements (25.17%; LIENs), 28.04 Mb of short interspersed nuclear elements (1.13%; SINEs), and 366.12 Mb of long terminal repeats (14.81%; LTRs), respectively (Table S8). Other types and unknown TEs accounted for 0.00097% and 0.17%, respectively (Table S8).

We integrated *de novo* prediction-based method, homology-based method and RNA sequence-based method to annotate the protein-coding genes. *De novo* prediction was performed using Augustus (2). Homologous gene sets of the protein gene sets from *Homo sapiens*, *Gorilla gorilla*, *Macaca mulatta*, *Mus musculus*, *Rhinopithecus roxellana* were searched in the *N. parkeri* genome with BLAST+. For RNA sequences-based method, the transcriptome sequences were mapped to the *N. parkeri* genome using GMAP (3). Finally, genes predicted from the above methods were integrated by EVIDENCEModeler (EVM) (4) into a non-redundant consensus of gene sets composing of 22,884 protein-coding genes (Table S6), with an average exon number per gene of 7.78. The average transcript length, average CDS length, average exon length and average intron length was 31,131 bp, 1,382 bp, 177 bp, and 4,381 bp, respectively (Table S7). These statistical indicators of the *N. parkeri* genome showed similar distribution patterns compared to

closely related species (Fig. S5), suggesting dependability of the annotation. Furthermore, a total of 22,788 predicted genes (accounting for 99.58% of total genes) were successfully annotated in at least one of the public databases. There were 21,378 (93.42%), 22,619 (92.00), and 22,629 (99.10%) genes annotated to SwissProt, TrEMBL, and NR database, respectively; 19,005 (83.05%) and 11,768 (51.42%) genes got positive hits in the KEGG and GO databases, respectively (Table S6). Four types of non-coding RNAs were identified of *N. parkeri* genome from homology-based and structure-based annotation, including 220 miRNAs, 1,509 rRNAs, 330 snRNAs, and 19,627 tRNAs, respectively (Table S9).

## References

1. Simão F. A., Waterhouse R. M., Ioannidis P., Kriventseva E. V., Zdobnov E. M. BUSCO: assessing genome assembly and annotation completeness with single-copy orthologs. *Bioinformatics* 31, 3210–3212 (2015).
2. Stanke M., Schöffmann O., Morgenstern B., Waack S. Gene prediction in eukaryotes with a generalized hidden Markov model that uses hints from external sources. *BMC Bioinformatics* 7, 62–73 (2006).
3. Wu T. D., Watanabe C. K. GMAP: a genomic mapping and alignment program for mRNA and EST sequences. *Bioinformatics* 21, 1859–1875 (2005).
4. Haas B. J. et al. Automated eukaryotic gene structure annotation using EVIDENCEModeler and the Program to Assemble Spliced Alignments. *Genome Biol.* 9, R7.1–R7.22 (2008).

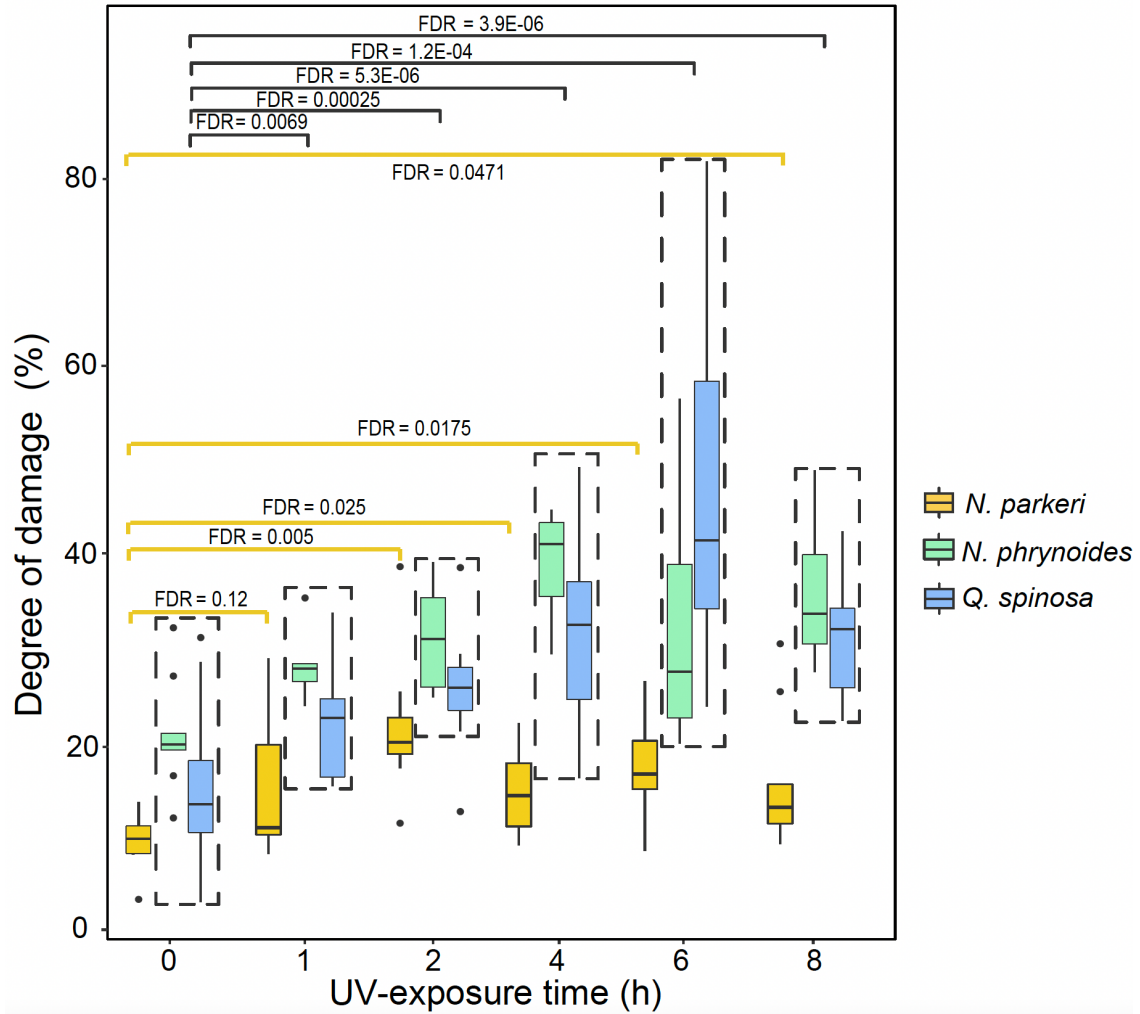

**Fig. S1.** Quantification of the degree of damage separately in skin of *N. parkeri* (yellow), *N. phrynooides* (green) and *Q. spinosa* (blue) throughout UV exposure based on histological sections. At each time point, at least 9 samples of each species (3 individuals x 3 fields per individual) were used for quantification. Degree of damage of UV-exposed groups was separately compared with the unexposed group (0 h) in each species for a two-tailed *t*-test (*N. phrynooides* and *Q. spinosa* were combined for testing). Box boundaries represent 1st and 3rd quartiles, middle line represents median, and whiskers extend to the nearer of the data extremes.

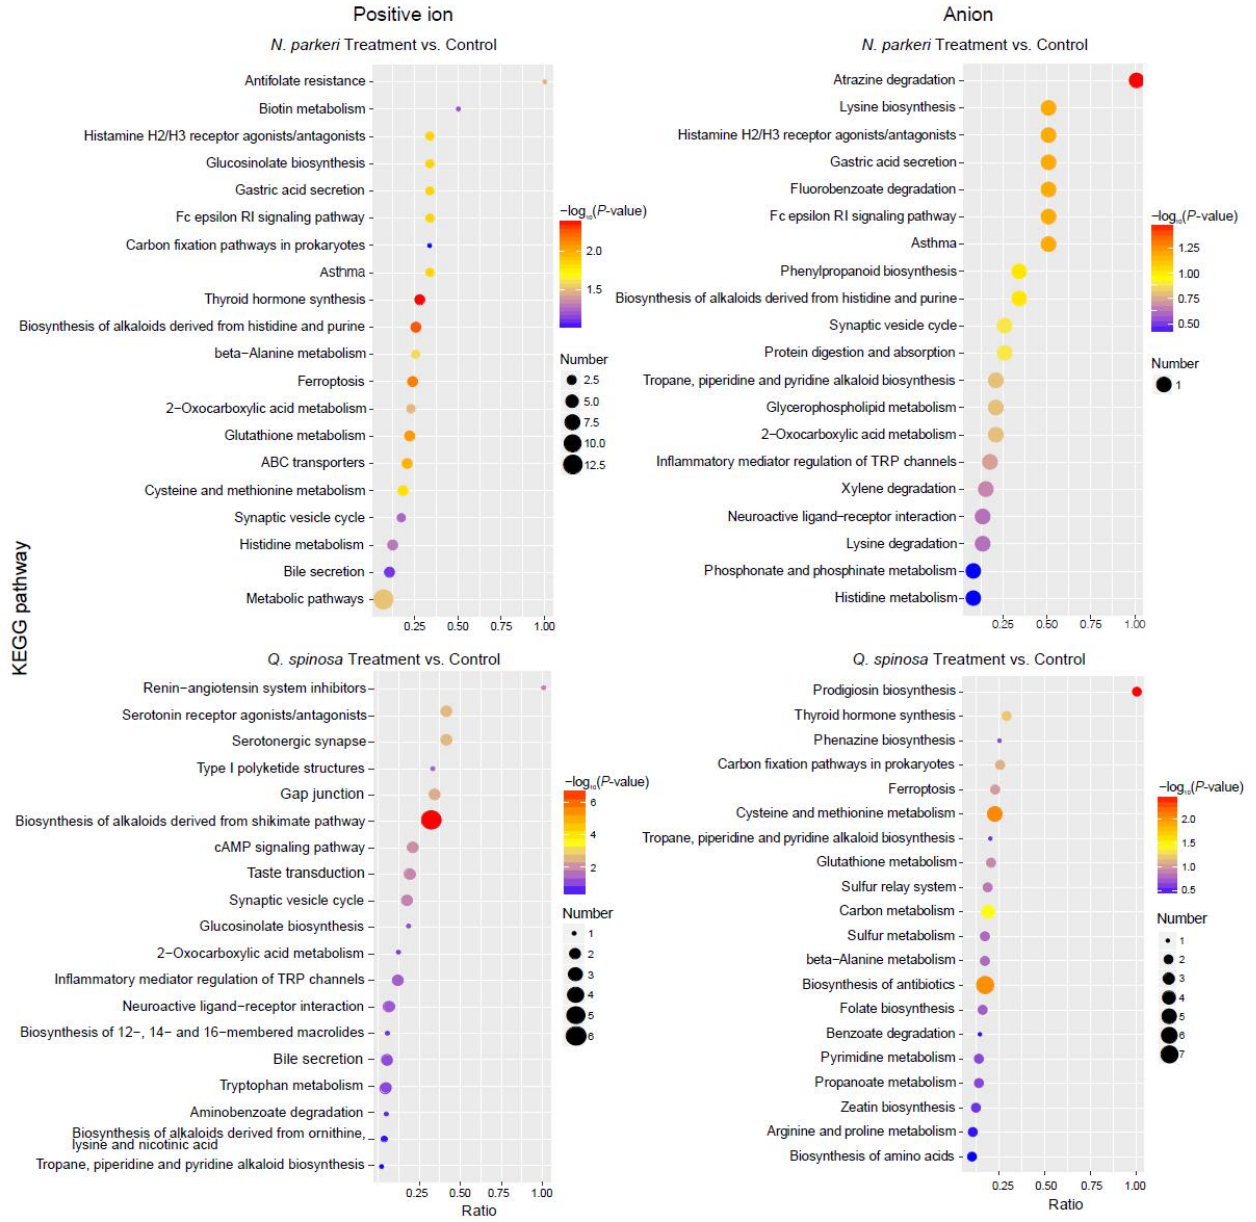

**Fig. S2.** Top 20 enrichment terms of the KEGG pathway of differently expressed metabolites (DEMs) between Treatment group (UV exposed for 8 h) and Control group (unexposed) based on a LC-MS/MS system. The identified metabolites were divided into positive ion (left tunnel) and anion (right tunnel). Ratio = (number of DEMs)/ (number of total identified metabolites). Higher ratios indicate higher enrichment. Color indicates the  $P$ -value of hypergeometric test, with blue indicating higher significance. Dot size represents number of identified DEMs.

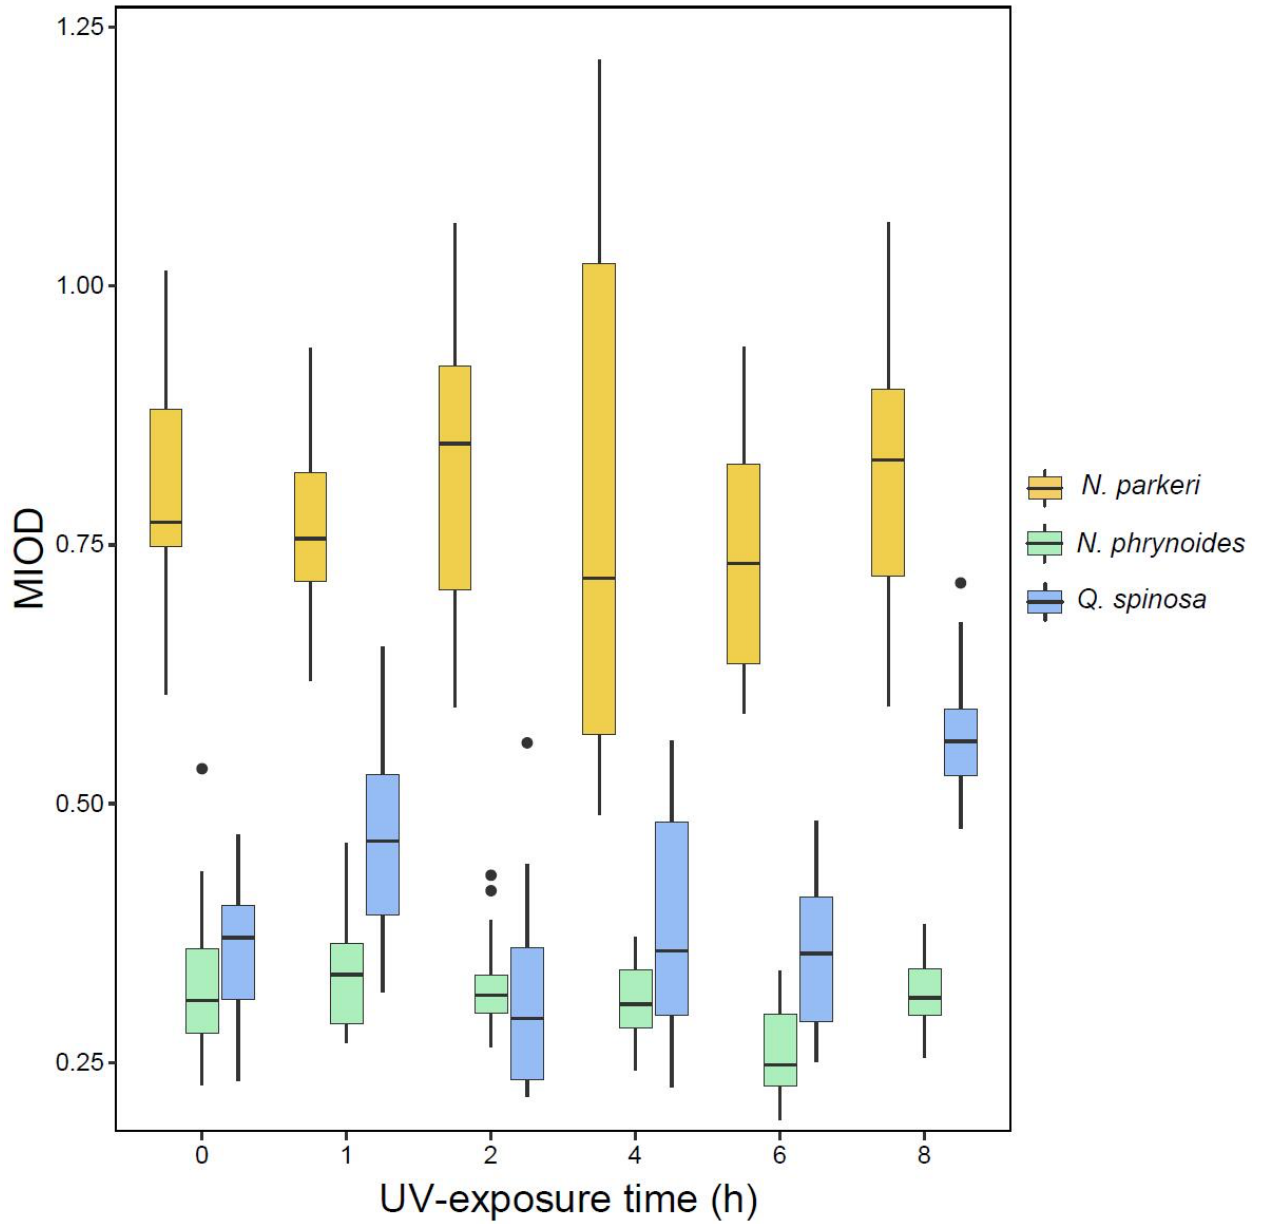

**Fig. S3.** Changes of the skin pigment content (MIOD) throughout UV exposure in *N. parkeri* (yellow), *N. phrynoides* (green) and *Q. spinosa* (blue) based on histological sections. At each time point, at least 9 samples of each species (3 individuals x 3 fields per individual) were used for quantification. Box boundaries represent 1st and 3rd quartiles, middle line represents median, and whiskers extend to the nearer of the data extremes.

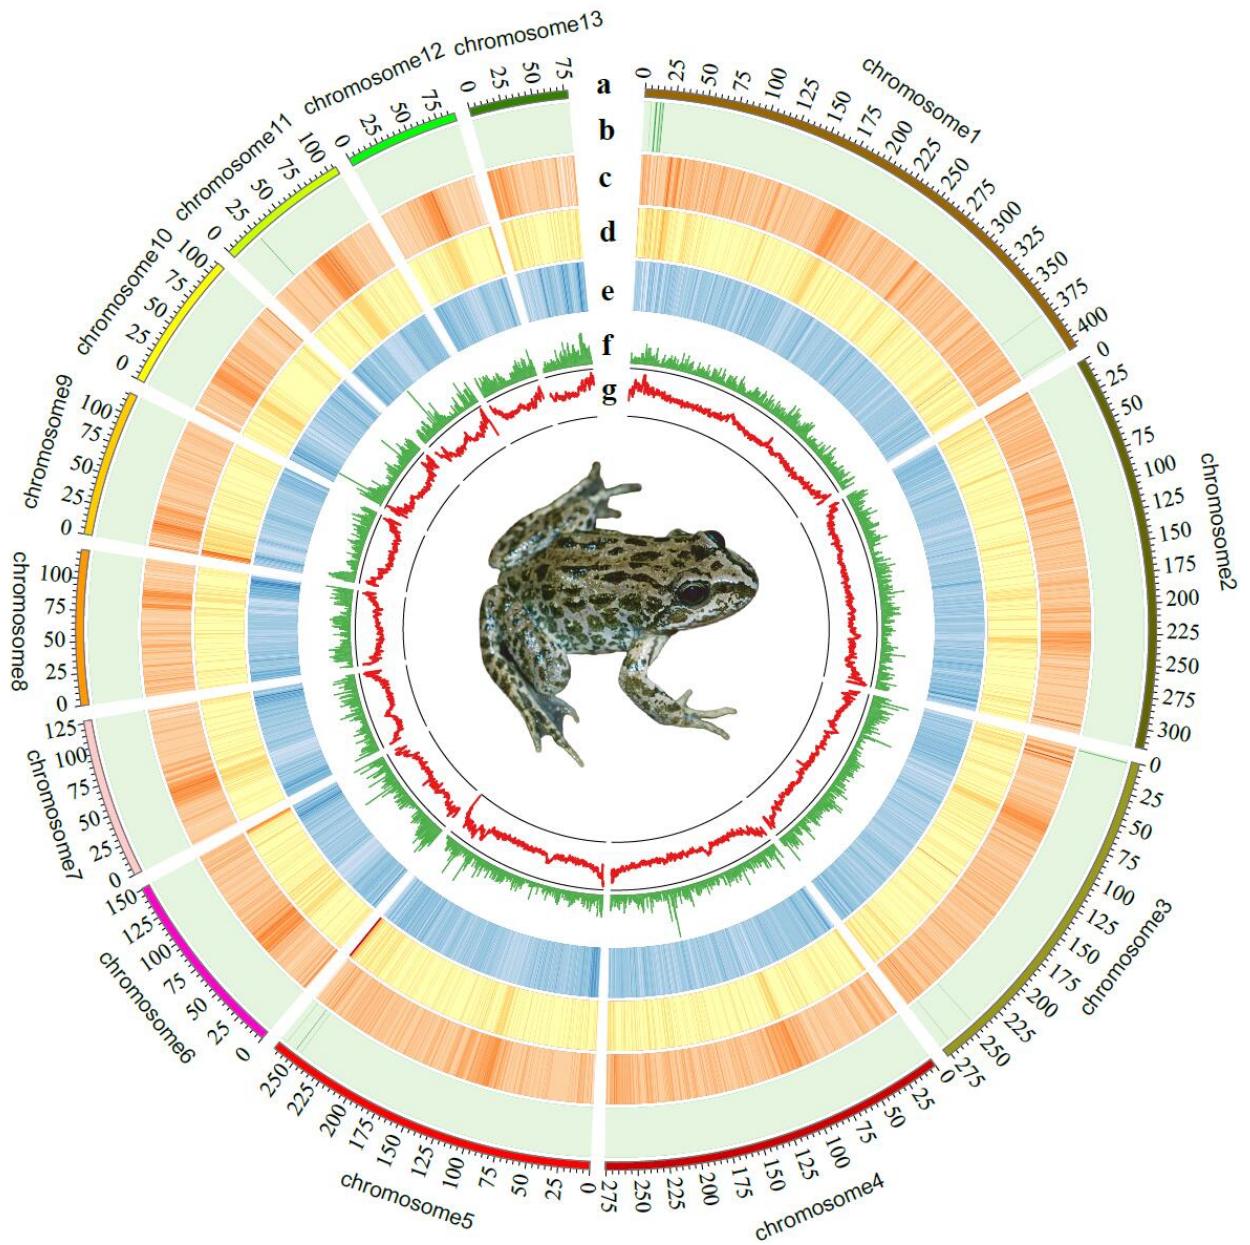

**Fig. S4.** Genome characteristics of *N. parkeri*. From outer circle to inner circle: **a**, Lines represent 13 chromosomes; **b**, Distribution of short interspersed nuclear elements (SINE); **c**, Distribution of long interspersed nuclear elements (LINE); **d**, Distribution of long terminal repeats (LTR); **e**, Distribution of DNA transposons; **f**, Distribution of GC content; **g**, Distribution of coding density.

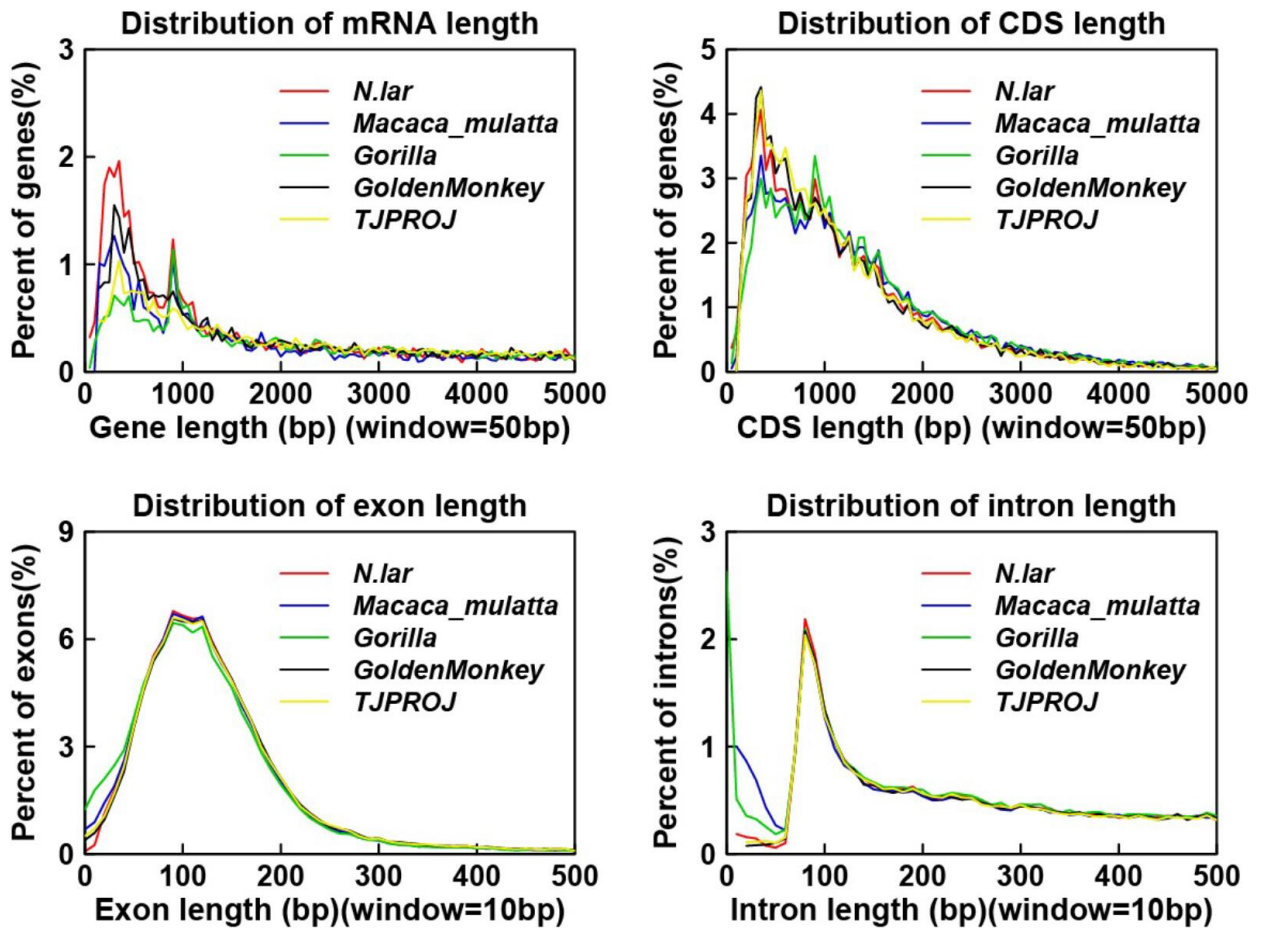

**Fig. S5.** Comparing the distribution of mRNA length, CDS length, exon length and intron length in *N. parkeri* genome with those in other species.



**a**Profiles ordered based on the  $P$ -value significance of genes assigned versus expected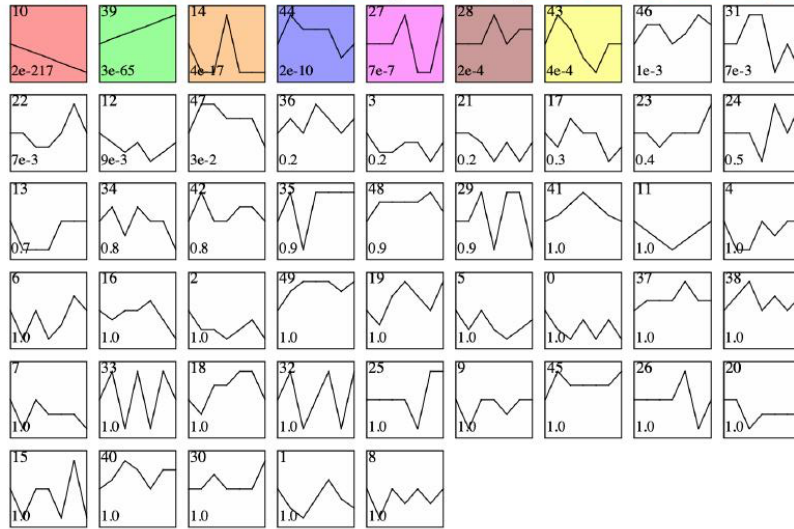**b**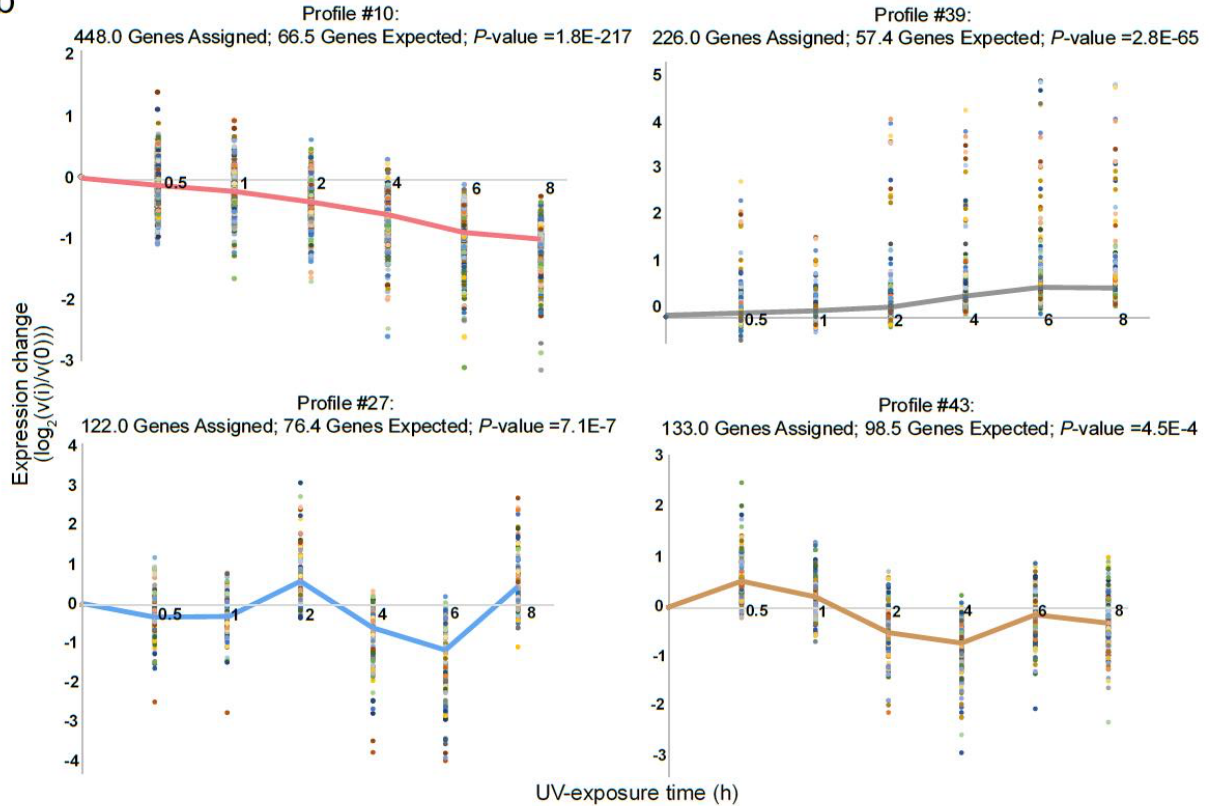

**Fig. S6.** Clustering of temporal expression genes by STEM in *N. parkeri* **(a)** and examples for expression patterns of gene groups **(b)**. **a**, Profiles that can be significantly ( $P < 0.001$ ) clustered are shown in color and ordered by significance. Other profiles are shown in white. The profile number is at the top-left corner and the  $P$ -value of significance is at the bottom left corner. **b**, Each dot represents a  $\log_2$  normalized expression change relative to 0 h ( $v(i)/v(0)$ ) of an individual gene. Solid line was concatenated from the median value in gene groups of time course.

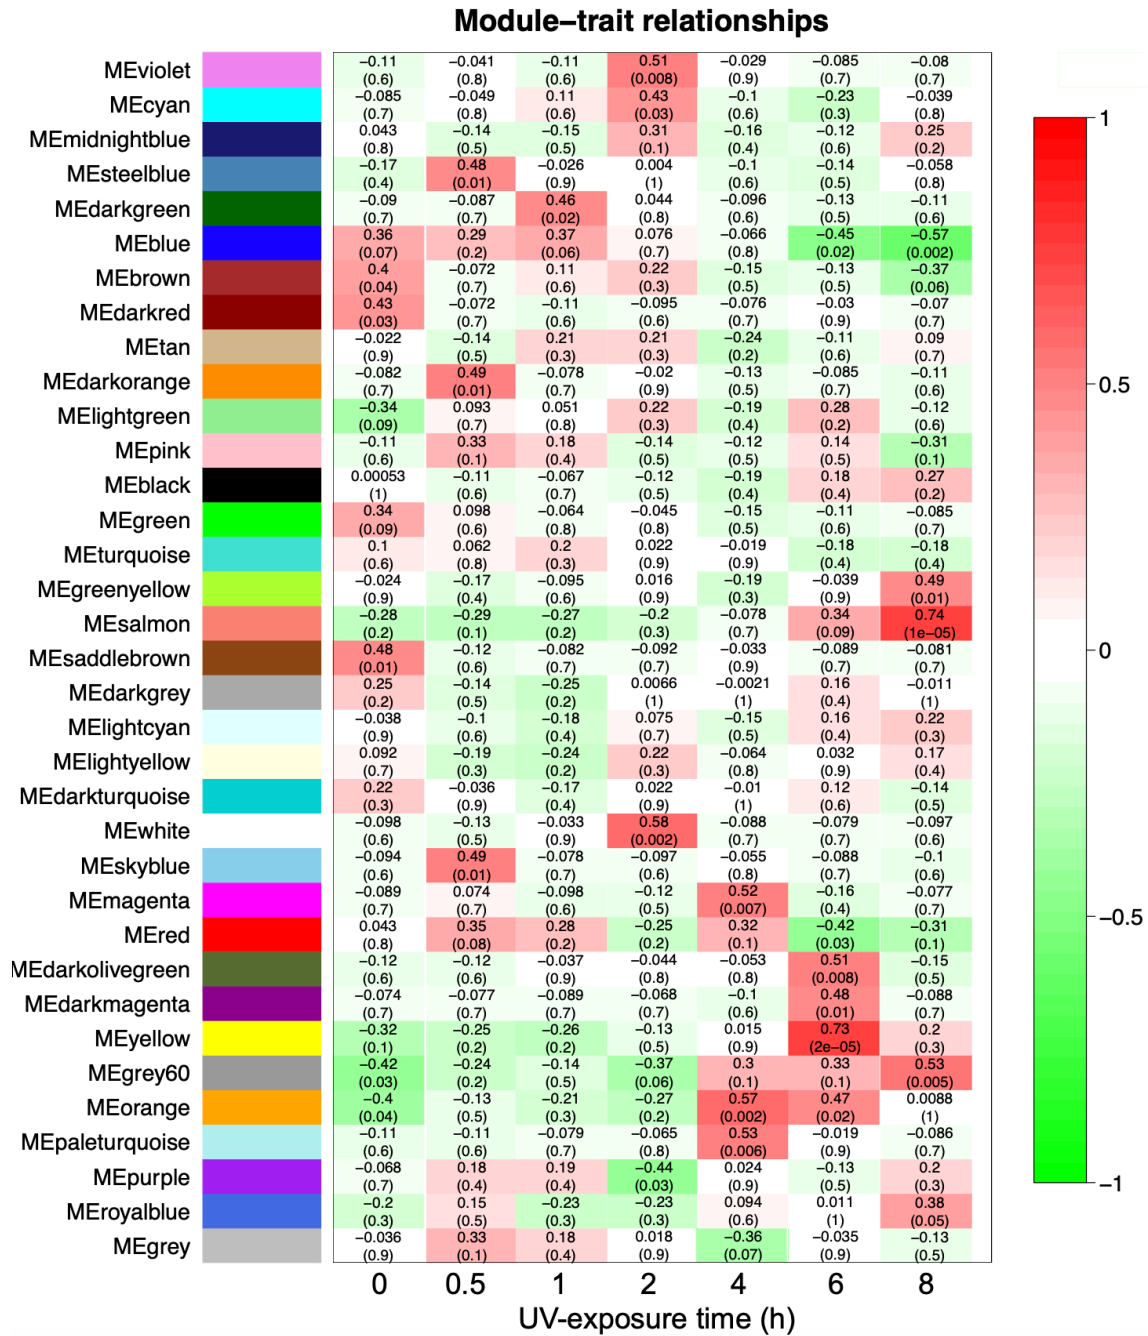

**Fig. S7.** Module–UV-exposure time relationships of mRNAs in *N. parkeri* according to the WGCNA analysis. The color indicates the respective correlation coefficient, as shown in the scale bar.

Functional enrichments of temporal genes in *N. parkeri*

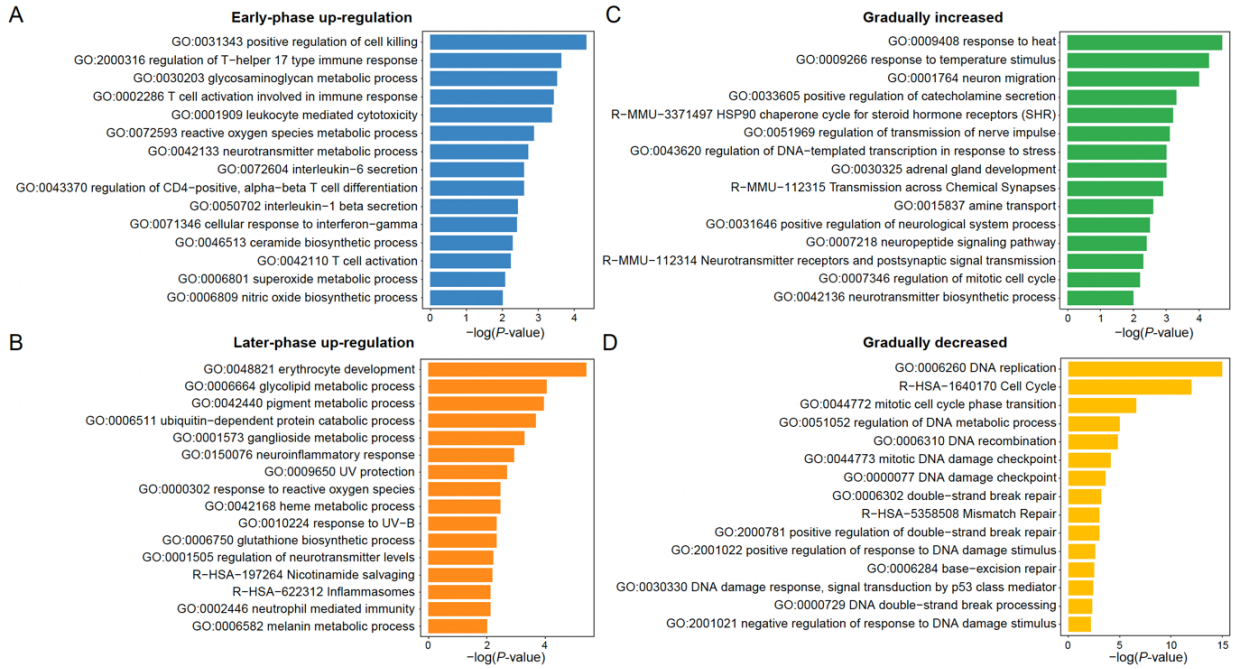

**Fig. S8.** Functional enrichments of genes in four temporal groups in *N. parkeri*. (A) Representative enrichment terms of genes in the early-phase upregulation group. (B) Representative enrichment terms of genes in the later-phase upregulation group. (C) Representative enrichment terms of genes in the gradually increased expression group. (D) Representative enrichment terms of genes in the gradually decreased expression group. Length of a histogram represents  $-\log$ -normalized significance of enrichment with  $P$  value.

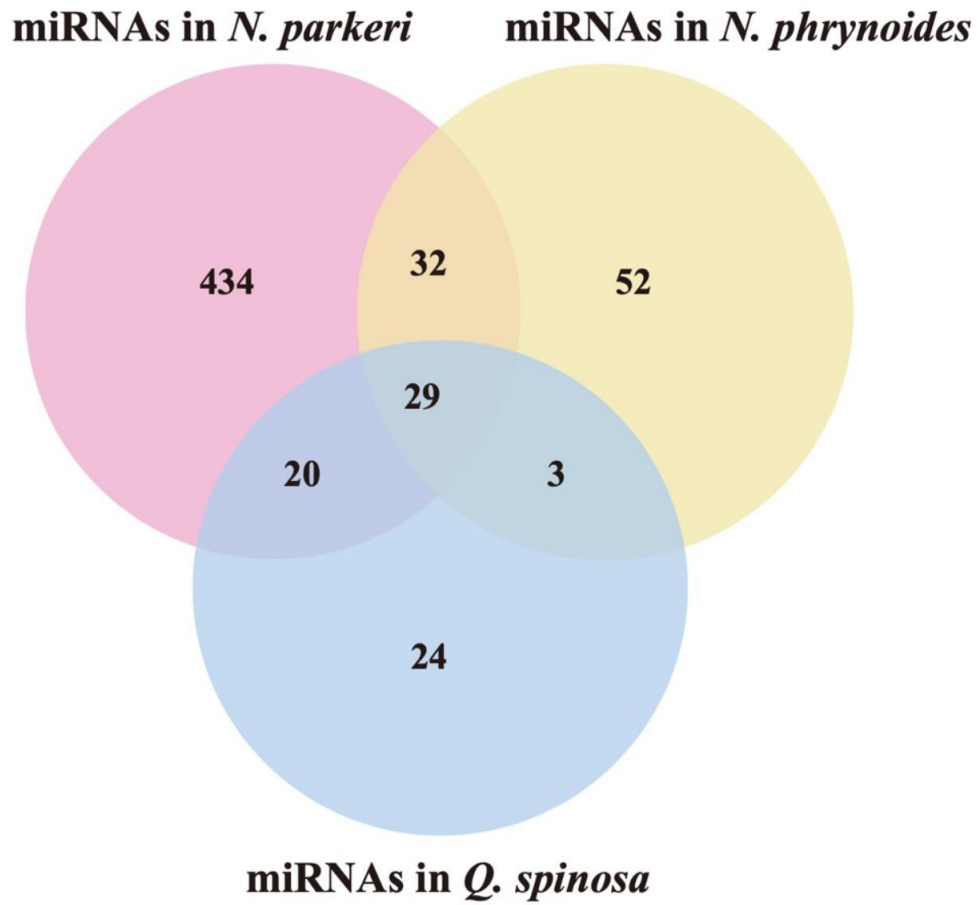

**Fig. S9.** The Venn diagram of total miRNAs identified in studied frogs.

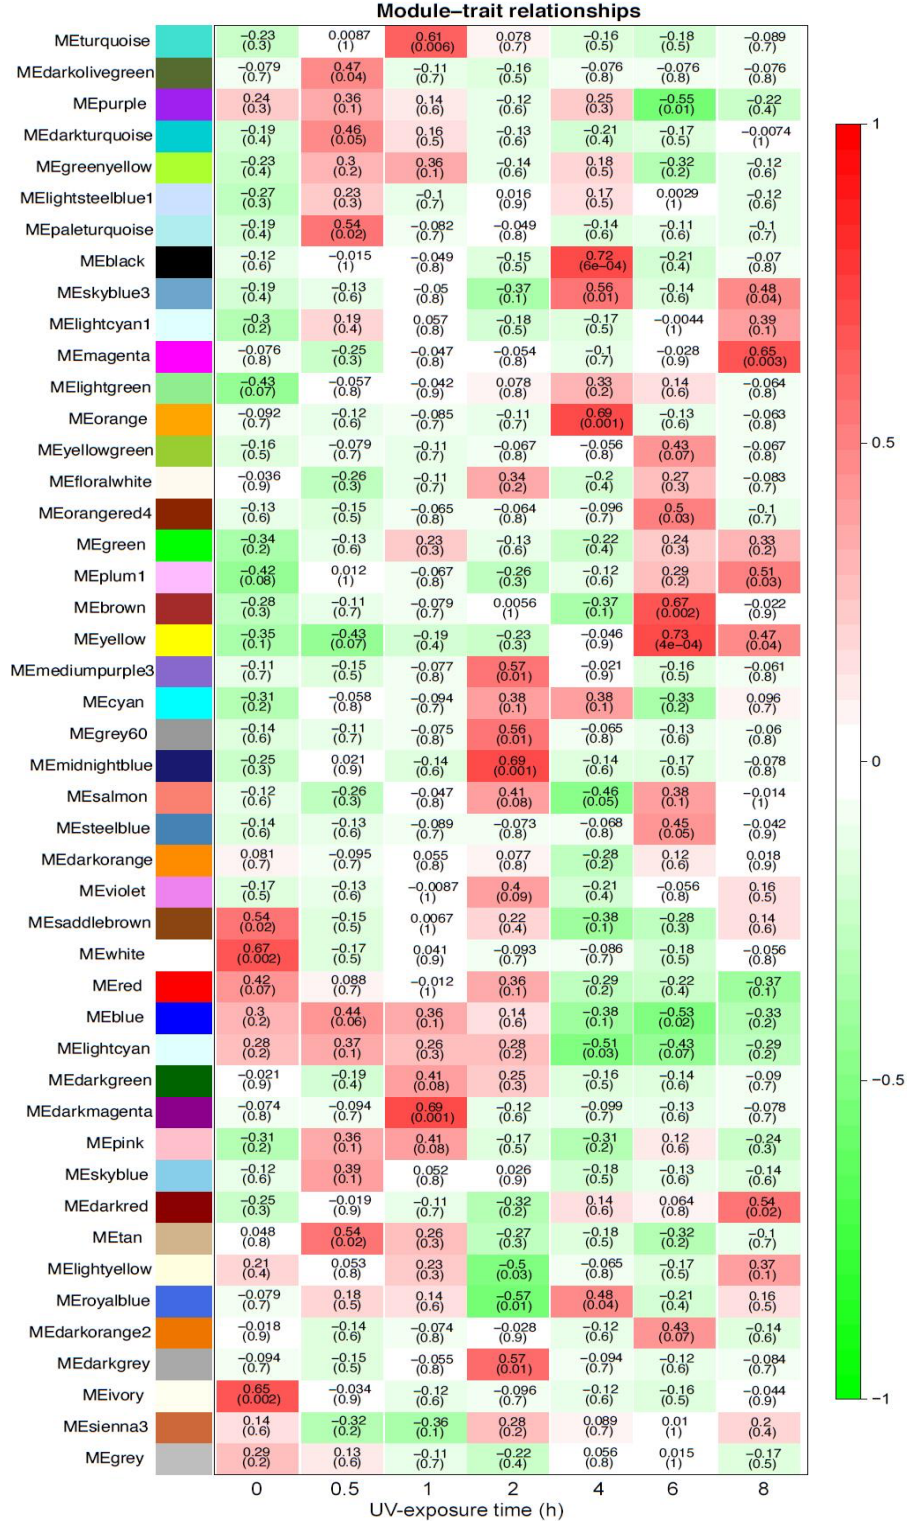

**Fig. S10.** Module-UV-exposure time relationships of miRNA-mRNAs in *N. parkeri* according to the WGCNA analysis. The color indicates the respective correlation coefficient, as shown in the scale bar.

Profiles ordered based on the  $P$ -value significance of number of genes assigned versus expected

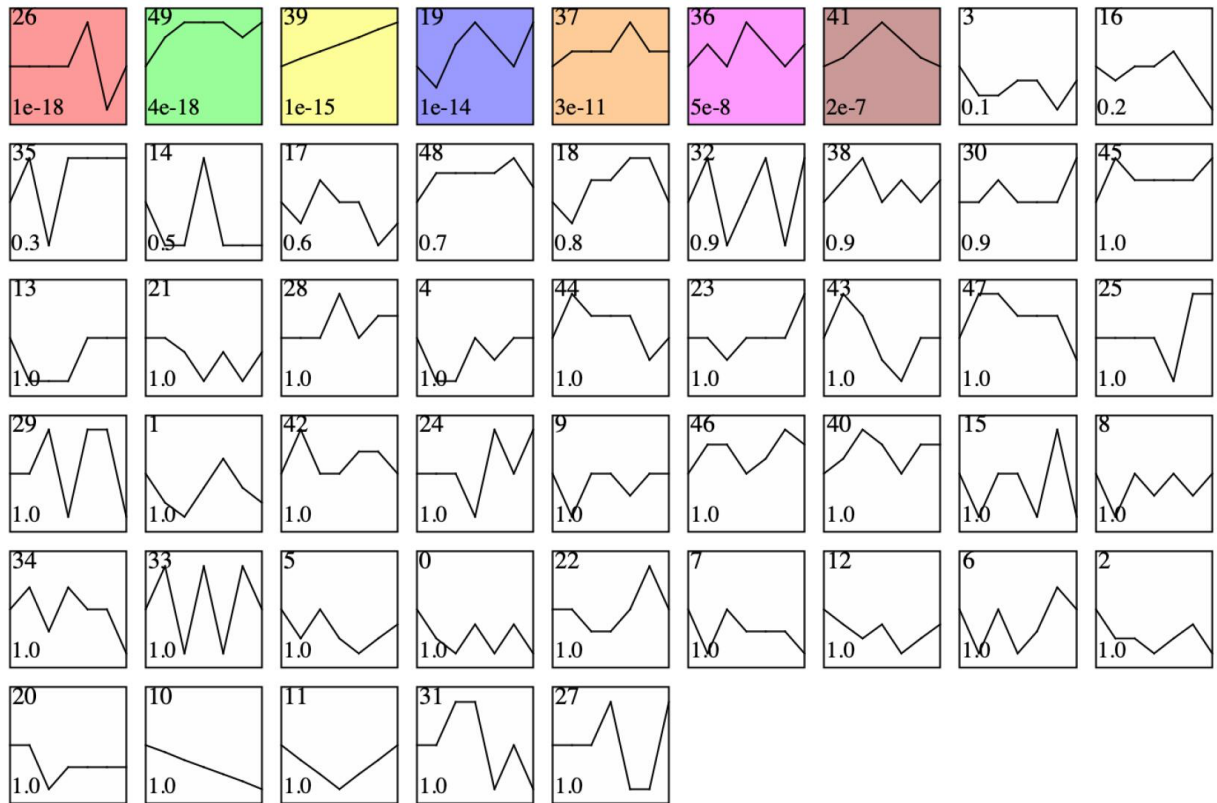

**Fig. S11.** Clustering of miRNA expression levels in *N. parkeri* by STEM. Profiles that can be significantly ( $P < 0.001$ ) clustered are shown in color and ordered by significance. Other profiles are shown in white. The profile number is at the top-left corner and the  $P$ -value of significance is at the bottom left corner. The miRNAs in Profile #39 which also showed inverse expression patterns relative to their predicted mRNAs were considered as co-expressed miRNAs in gradually-decreased group.

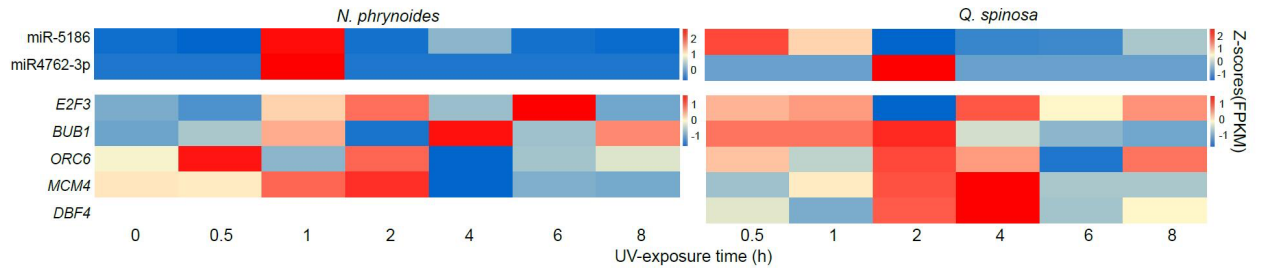

**Fig. S12.** Expression heatmaps of orthologous miRNAs (upper panels) and mRNAs (lower panels) in *N. phrynooides* and *Q. spinosa*. The color represents an average of expression level (FPKM) normalized by Z-scores.

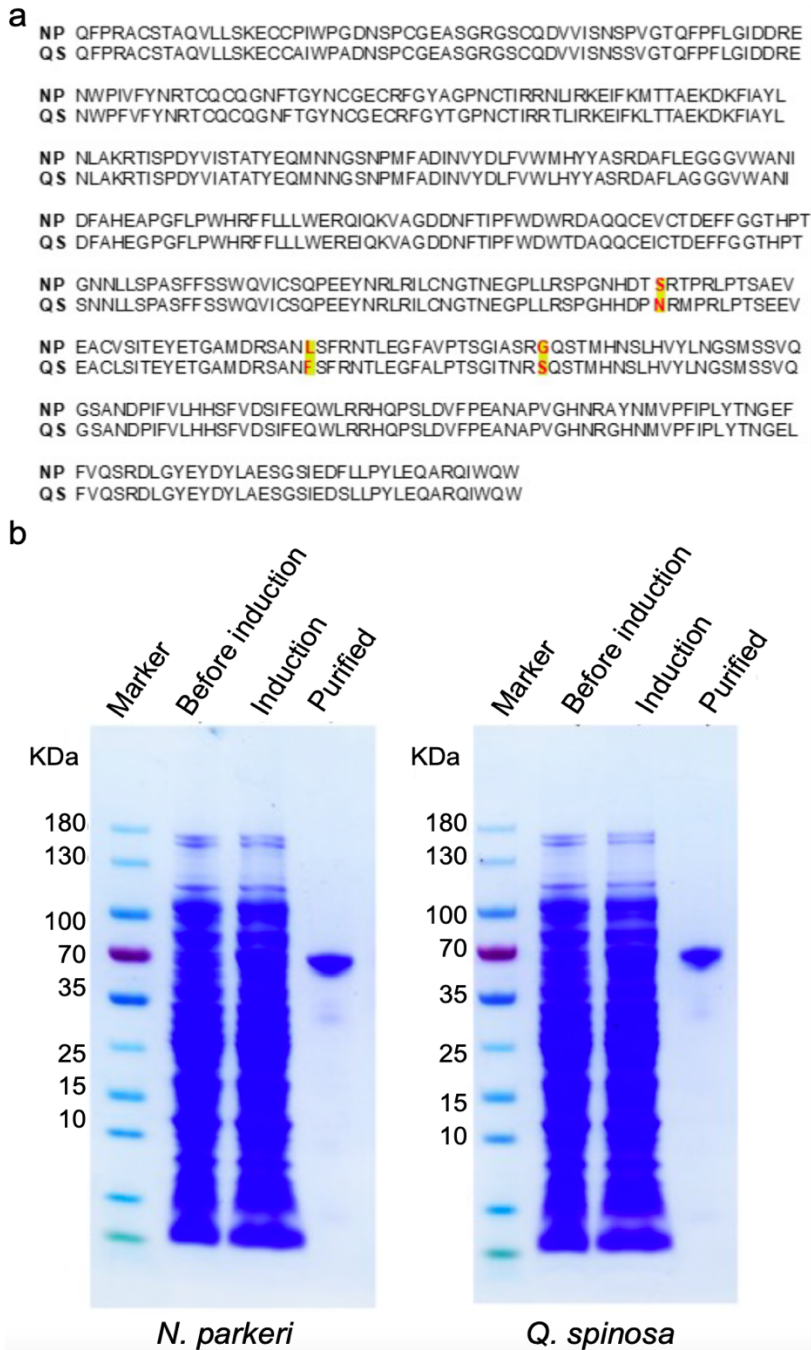

**Fig. S13.** Amino acids sequences (**a**) and expression *in vitro* of tyrosinase (TYR) (**b**) in *N. parkeri* and *Q. spinosa*. **a**, Sequences aligned here were used to synthesize TYR and then to identify *in vitro* enzymological kinetic analyses. Amino acids replacements that are unique to *N. parkeri* are marked with red font and yellow highlighting. These *N. parkeri* unique replacements were found to be under positive selection. **b**, Synthetic TYR was expressed in BL21, purified with Ni-NTA agarose columns, and analyzed by SDS-PAGE. Lane 1: protein marker; lane 2: negative control; lane 3: protein expression after induction; and lane 4: purified protein.



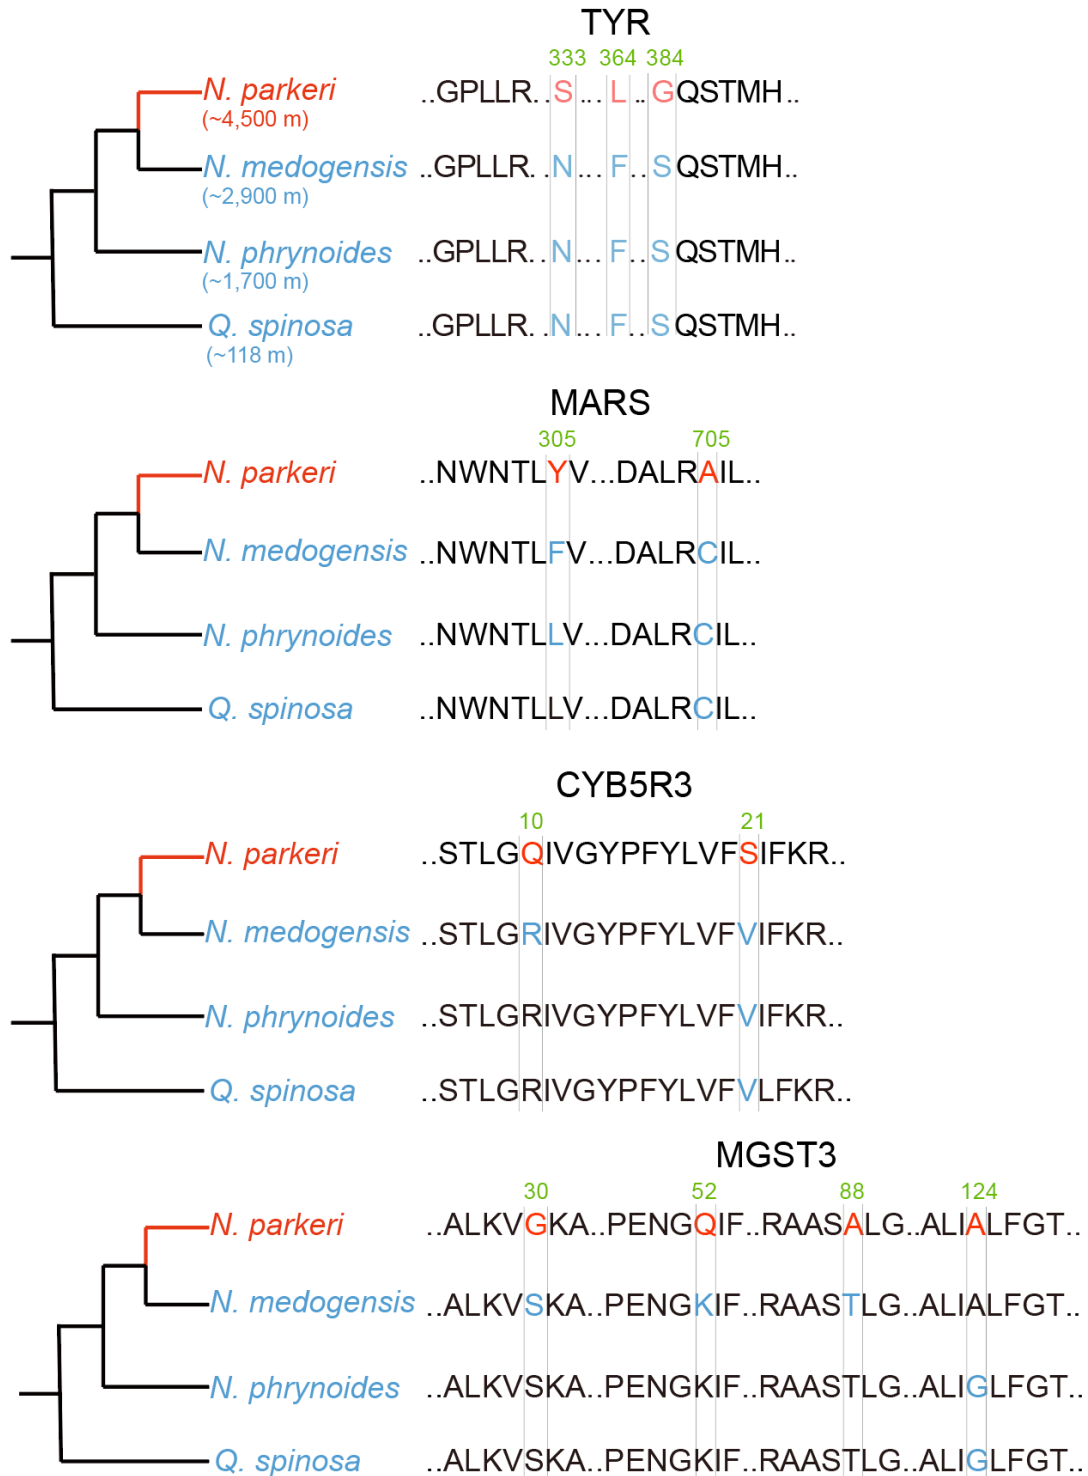

**Fig. S14.** Phylogenetic relationships and examples of schematic alignment of amino acid (AA) replacements in *N. parkeri* and lower-elevation relatives. AA replacements unique to *N. parkeri* are marked with red font. The number above the alignments refers to the reference sequence of *N. parkeri*. Single-letter abbreviations for the amino acid residues are as follows: A, Ala; C, Cys; D, Asp; E, Glu; F, Phe; G, Gly; I, Ile; K, Lys; L, Leu; N, Asn; P, Pro; Q, Gln; R, Arg; S, Ser; T, Thr; V, Val; W, Trp; Y, Tyr.

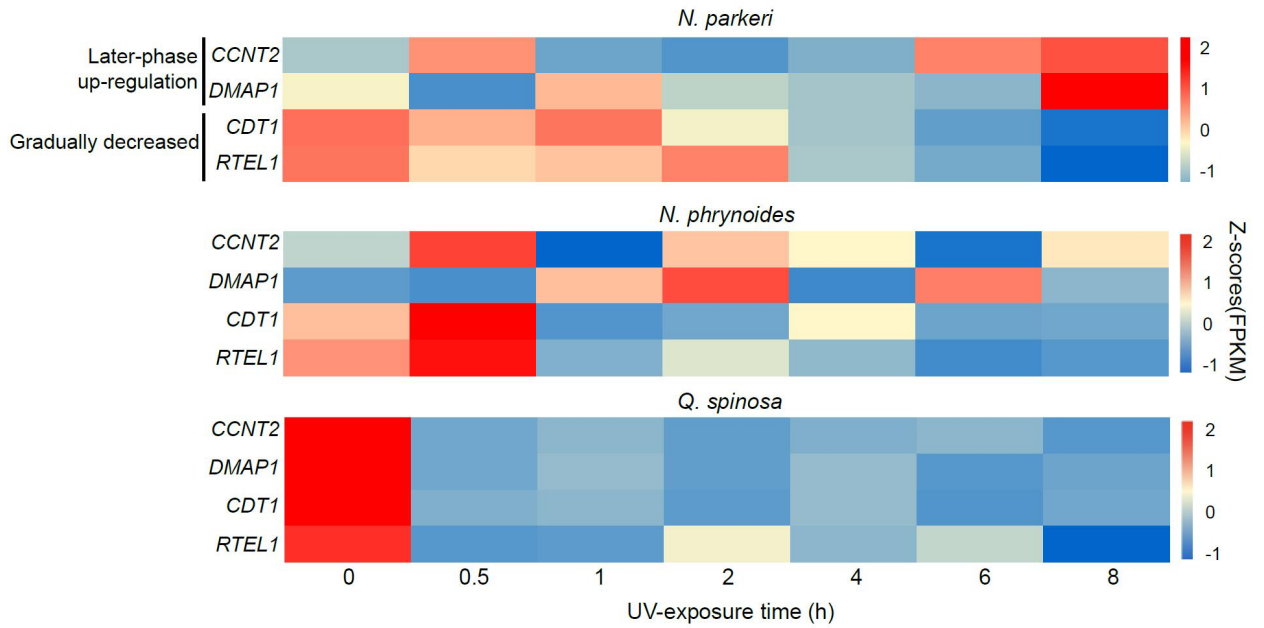

**Fig. S15.** Expression changes of temporal expression genes in *N. parkeri* and corresponding orthologs in lower-elevation relatives (*N. phrynooides* and *Q. spinosa*) throughout UV exposure. The color represents an average of expression level (FPKM) at a time point normalized by Z-scores.

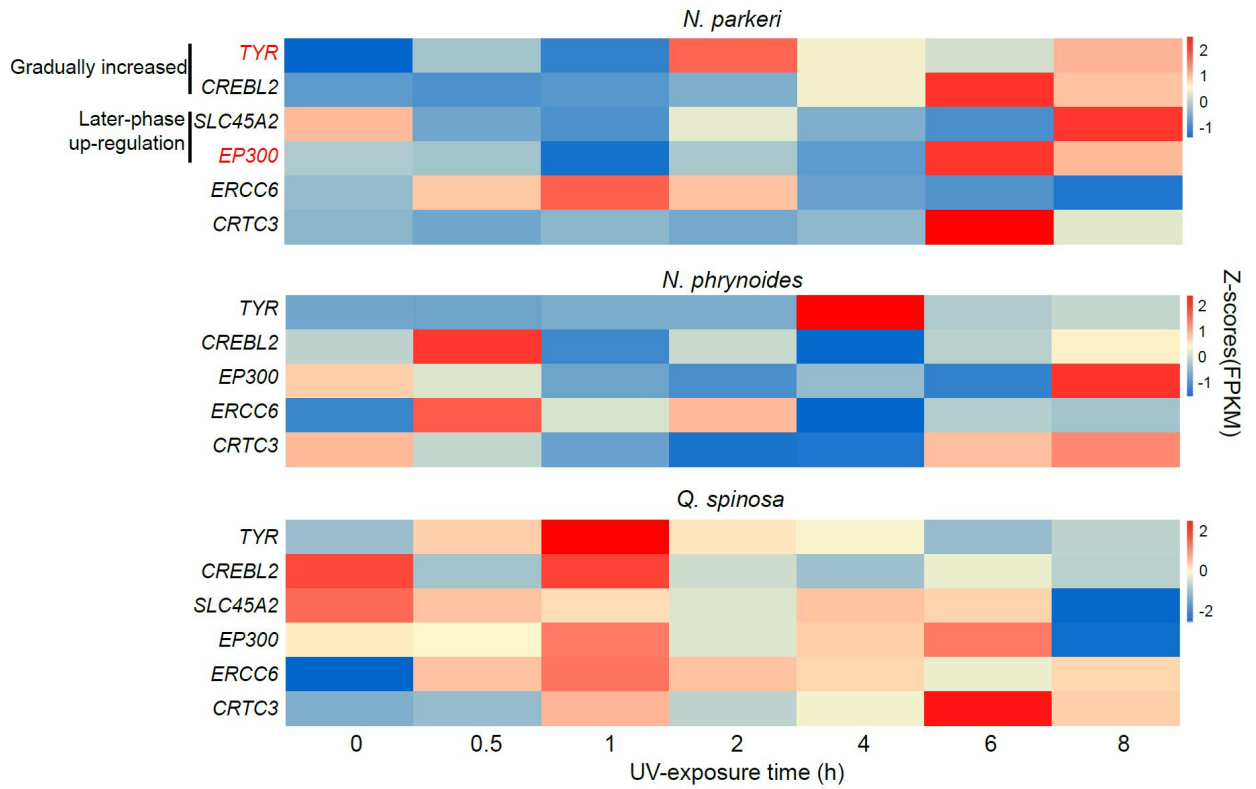

**Fig. S16.** Expression changes of PSGs and temporal expression genes in *N. parkeri*, and corresponding orthologs in lower-elevation relatives (*N. phrynooides* and *Q. spinosa*) throughout UV exposure. PSGs in *N. parkeri* are in red font. The color of the scare bar represents an average expression level (FPKM) at a time point normalized by Z-scores.

**Table S1.** Specimen information, collection sites, and use of samples (Y = yes; N = no).

|                                                                            | <i>N. parkeri</i>                   | <i>N. phrynooides</i>                      | <i>Q. spinosa</i>                        |
|----------------------------------------------------------------------------|-------------------------------------|--------------------------------------------|------------------------------------------|
| <b>Sampling location</b>                                                   | Mozhugongka, Tibet, China (4,478 m) | Jingdong, Yunnan Province, China (1,760 m) | Huangshan, Anhui Province, China (176 m) |
| <b>Histological sections</b>                                               | Y                                   | Y                                          | Y                                        |
| <b>Identification of ABTS<sup>+</sup> free radical-scavenging activity</b> | Y                                   | N                                          | Y                                        |
| <b>Metabolite identification</b>                                           | Y                                   | N                                          | Y                                        |
| <b>Genome sequencing</b>                                                   | Y                                   | N                                          | N                                        |
| <b>Time-course UV exposure</b>                                             | Y                                   | Y                                          | Y                                        |
| <b>RNA-seq</b>                                                             | Y                                   | Y                                          | Y                                        |
| <b>miRNA-seq</b>                                                           | Y                                   | Y                                          | Y                                        |
| <b>Tyrosinase synthesis and activity identification</b>                    | Y                                   | N                                          | Y                                        |

**Table S2.** Statistics of contig-level genome assemble of *N. parkeri*. N90: the length of the smallest contig in the set that contains the fewest (largest) contigs whose combined length represents at least 90% of the assembly, and so on for N80 to N50.

|                   | Origin Falcon |        | Polish        |        | Pilon         |        |
|-------------------|---------------|--------|---------------|--------|---------------|--------|
|                   | Size (bp)     | Number | Size (bp)     | Number | Size (bp)     | Number |
| <b>N90</b>        | 183,302       | 1,563  | 184,350       | 1,565  | 184,362       | 1,565  |
| <b>N80</b>        | 635,982       | 854    | 640,635       | 855    | 640,378       | 855    |
| <b>N70</b>        | 1,181,135     | 575    | 1,187,113     | 576    | 1,186,991     | 576    |
| <b>N60</b>        | 1,733,635     | 406    | 1,745,301     | 406    | 1,744,822     | 406    |
| <b>N50</b>        | 2,323,300     | 282    | 2,337,137     | 283    | 2,336,739     | 283    |
| <b>Longest</b>    | 13,630,581    | ----   | 13,716,666    | ----   | 13,710,411    | ----   |
| <b>Total Size</b> | 2,456,683,934 | ----   | 2,473,585,870 | ----   | 2,472,697,895 | ----   |
| <b>&gt;=100bp</b> | ----          | 7,134  | ----          | 7,134  | ----          | 7,134  |
| <b>&gt;=2kb</b>   | ----          | 6,884  | ----          | 6,887  | ----          | 6,886  |

**Table S3.** Statistics of *N. parkeri* genome assessment with BUSCO.

| <b>Number</b> | <b>Percentage (%)</b> | <b>Type</b>                         |
|---------------|-----------------------|-------------------------------------|
| 2272          | 87.9                  | Complete BUSCOs (C)                 |
| 2146          | 83                    | Complete and single-copy BUSCOs (S) |
| 126           | 4.9                   | Complete and duplicated BUSCOs (D)  |
| 145           | 5.6                   | Fragmented BUSCOs (F)               |
| 169           | 6.5                   | Missing BUSCOs (M)                  |
| 2586          | ----                  | Total BUSCO groups searched         |

**Table S4.** Statistics of chromosome-level genome assemble of *N. parkeri*.

|                                 | Scaffold      |        |
|---------------------------------|---------------|--------|
|                                 | Size(bp)      | Number |
| <b>N90</b>                      | 107,000,516   | 11     |
| <b>N80</b>                      | 116,390,974   | 9      |
| <b>N70</b>                      | 126,942,726   | 7      |
| <b>N60</b>                      | 150,785,030   | 6      |
| <b>N50</b>                      | 268,565,388   | 5      |
| <b>Longest</b>                  | 407,978,197   | ----   |
| <b>Total Size</b>               | 2,475,211,768 | ----   |
| <b>Total Number(&gt;=100bp)</b> | ----          | 1,869  |
| <b>Total Number(&gt;=2kb)</b>   | ----          | 1,732  |

**Table S5.** Comparison of genome assemble and annotation among anuran amphibians.

| <b>Species</b>                    | <b>Assembled genome size (Gb)</b> | <b>Contig N50 (bp)</b> | <b>Scaffold N50 (bp)</b> | <b>Repetitive sequences (%)</b> | <b>Protein coding genes</b> |
|-----------------------------------|-----------------------------------|------------------------|--------------------------|---------------------------------|-----------------------------|
| <i>Nanorana parkeri</i>           | 2.47                              | 2,336,739              | 268,565,388              | 58.9                            | 22,884                      |
| <i>Leptobranchium leishanense</i> | 3.5                               | 1,931,129              | 394,693,044              | 77.1                            | 23,420                      |
| <i>Leptobranchium ailaonicum</i>  | 3.58                              | 821,125                | 412,424,790              | 69.48                           | 26,227                      |
| <i>Rana catesbeiana</i>           | 5.8                               | 5,239                  | 68,964                   | 66.9                            | 22,000                      |
| <i>Rhinella marina</i>            | 2.6                               | 167,489                | 167,489                  | 86.6                            | 58,302                      |
| <i>Oophaga pumilio</i>            | 5.5                               | 3,942                  | 59,503                   | 62.9                            | 17,051                      |
| <i>Xenopus tropicalis</i>         | 1.5                               | 71,041                 | 135,134,832              | 51.9                            | 27,047                      |
| <i>Xenopus laevis</i>             | 2.7                               | 19,713                 | 136,570,856              | 38.3                            | 37,385                      |



**Table S6.** Statistics of gene annotation in *N. parkeri* genome.

|                    |           | <b>Number</b> | <b>Percent (%)</b> |
|--------------------|-----------|---------------|--------------------|
| <b>Total</b>       |           | 22,884        |                    |
| <b>Annotated</b>   | InterPro  | 21,140        | 92.38              |
|                    | GO        | 11,768        | 51.42              |
|                    | KEGG      | 19,005        | 83.05              |
|                    | Swissprot | 21,378        | 93.42              |
|                    | TrEMBL    | 22,619        | 92                 |
|                    | NR        | 22,679        | 99.1               |
| <b>Unannotated</b> |           | 96            | 0.42               |

**Table S7.** Statistics of gene prediction.

| Gene set            | Number | Average transcript length (bp) | Average CDS length (bp) | Average exon per gene | Average exon length (bp) | Average intron length (bp) |
|---------------------|--------|--------------------------------|-------------------------|-----------------------|--------------------------|----------------------------|
| <b>de novo</b>      |        |                                |                         |                       |                          |                            |
| <i>AUGUSTUS</i>     | 21,608 | 52,280                         | 1,338                   | 7.7                   | 173                      | 7,575                      |
| <i>H. sapiens</i>   | 19,133 | 39,177                         | 1,661                   | 9.4                   | 177                      | 4,462                      |
| <i>G. gorilla</i>   | 20,479 | 33,465                         | 1,501                   | 8.6                   | 173                      | 4,187                      |
| <b>Homolog</b>      |        |                                |                         |                       |                          |                            |
| <i>M. mulatta</i>   | 20,538 | 34,652                         | 1,499                   | 8.7                   | 172                      | 4,300                      |
| <i>M. musculus</i>  | 17,756 | 38,852                         | 1,571                   | 9                     | 174                      | 4,664                      |
| <i>R. roxellana</i> | 20,279 | 34,597                         | 1,585                   | 8.9                   | 177                      | 4,165                      |
| <b>Final set</b>    | 22,884 | 31,131                         | 1,382                   | 7.78                  | 177                      | 4,381                      |

**Table S8.** Statistics of annotated transposable elements (TEs).

| Type           | Rebase<br>TEs length<br>(bp) | % in<br>genome | TE<br>proteins<br>length (bp) | % in<br>genome | De novo<br>length (bp) | % in<br>genome | Combined TEs  |                |
|----------------|------------------------------|----------------|-------------------------------|----------------|------------------------|----------------|---------------|----------------|
|                |                              |                |                               |                |                        |                | Length (Bp)   | % in<br>genome |
| <b>DNA</b>     | 94,358,202                   | 3.82           | 15,323,977                    | 0.61           | 530,152,426            | 21.44          | 574,368,176   | 23.23          |
| <b>LINE</b>    | 85,162,083                   | 3.44           | 127,854,008                   | 5.17           | 570,544,992            | 23.07          | 622,326,934   | 25.17          |
| <b>SINE</b>    | 8,690,955                    | 0.35           | 0                             | 0              | 20,450,549             | 0.83           | 28,042,113    | 1.13           |
| <b>LTR</b>     | 40,483,305                   | 1.64           | 24,854,865                    | 1.01           | 351,387,174            | 14.21          | 366,123,006   | 14.81          |
| <b>Other</b>   | 14,470                       | 0.0006         | 0                             | 0              | 9,698                  | 0.0004         | 24,049        | 0.001          |
| <b>Unknown</b> | 0                            | 0              | 0                             | 0              | 4,154,629              | 0.17           | 4,154,629     | 0.17           |
| <b>Total</b>   | 220,290,016                  | 8.91           | 168,006,648                   | 6.79           | 1,320,029,475          | 53.38          | 1,364,981,392 | 55.2           |

**Table S9.** Statistics of non-coding RNA prediction.

| <b>Type</b> |          | <b>Copy</b> | <b>Average length (bp)</b> | <b>Total length (bp)</b> | <b>% of genome</b> |
|-------------|----------|-------------|----------------------------|--------------------------|--------------------|
| miRNA       |          | 220         | 94.66                      | 20,826                   | 0.000842           |
| tRNA        |          | 19,627      | 75.12                      | 1,474,328                | 0.059624           |
| rRNA        | rRNA     | 1,509       | 137.07                     | 206,838                  | 0.008365           |
|             | 18S      | 122         | 293.8                      | 35,843                   | 0.00145            |
|             | 28S      | 284         | 196.34                     | 55,760                   | 0.002255           |
|             | 5.8S     | 23          | 105.52                     | 2,427                    | 0.000098           |
|             | 5S       | 1,080       | 104.45                     | 112,808                  | 0.004562           |
| snRNA       | snRNA    | 330         | 128.66                     | 42,457                   | 0.001717           |
|             | CD-box   | 41          | 104.61                     | 4,289                    | 0.000173           |
|             | HACA-box | 25          | 143.16                     | 3,579                    | 0.000145           |
|             | splicing | 258         | 128.64                     | 33,190                   | 0.001342           |

**Table S10.** Statistics of the transcriptome assemblies of *N. phrynoides* and *Q. spinosa*.

|                         | <i>N. phrynoides</i> | <i>Q. spinosa</i> |
|-------------------------|----------------------|-------------------|
| <b>Number of seqs</b>   | 178,551              | 81,931            |
| <b>Mean length (bp)</b> | 973.96               | 1259.67           |
| <b>Longest (bp)</b>     | 26,386               | 90,220            |
| <b>N90</b>              | 402                  | 498               |
| <b>N70</b>              | 731                  | 1,218             |
| <b>N50</b>              | 1,471                | 2,071             |

**Table S11.** Relationships of co-expressed miRNA-mRNAs in gradually-decreased and later-phase temporal groups in *N. parkeri*.

| <b>Gradually decreased group</b>      |                 |                            |                |            |
|---------------------------------------|-----------------|----------------------------|----------------|------------|
| <b>miRNA</b>                          | <b>mRNA</b>     | <b>Pearson Correlation</b> | <b>P-value</b> |            |
| gga-miR-456-3p                        | <i>C1orf112</i> | -0.8191004                 | 0.02418845     |            |
|                                       | <i>ATAD2B</i>   | -0.7916125                 | 0.03391129     |            |
| hsa-miR-4711-5p                       | <i>CHAF1B</i>   | -0.7801322                 | 0.03852019     |            |
|                                       | <i>MSANTD3</i>  | -0.8699893                 | 0.01090092     |            |
|                                       | <i>NFIA</i>     | -0.8444652                 | 0.01682064     |            |
|                                       | <i>CDCA7</i>    | -0.8504237                 | 0.01530709     |            |
|                                       | <i>UBAP1L</i>   | -0.9033303                 | 0.00529432     |            |
|                                       | <i>SLC8A1</i>   | -0.7823912                 | 0.03758749     |            |
|                                       | <i>BCAT1</i>    | -0.7940028                 | 0.0329926      |            |
|                                       | <i>ACAD8</i>    | -0.8179993                 | 0.02454278     |            |
| hsa-miR-4762-3p                       | <i>B3GALT5</i>  | -0.7964512                 | 0.03206616     |            |
|                                       | <i>CRP</i>      | -0.8493524                 | 0.01557322     |            |
|                                       | <i>DBF4</i>     | -0.763739                  | 0.04566992     |            |
| gga-miR-6587-5p                       | <i>LRRFIP2</i>  | -0.7713126                 | 0.04228331     |            |
|                                       | <i>CDT1</i>     | -0.7570061                 | 0.04880151     |            |
| hsa-miR-5186                          | <i>ORC6</i>     | -0.8105978                 | 0.0270001      |            |
|                                       | <i>MCM4</i>     | -0.7696406                 | 0.0430186      |            |
|                                       | <i>RNASEH2C</i> | -0.8340297                 | 0.01966894     |            |
| hsa-miR-1288-5p                       | <i>ORC6</i>     | -0.7679027                 | 0.04379029     |            |
| hsa-miR-1288-3p                       | <i>PAPPA</i>    | -0.7971506                 | 0.03180424     |            |
|                                       | <i>CRP</i>      | -0.7832334                 | 0.037243       |            |
|                                       | <i>GINS4</i>    | -0.765581                  | 0.04483301     |            |
|                                       | <i>THUMPD1</i>  | -0.835378                  | 0.01928667     |            |
|                                       | <i>ORC6</i>     | -0.8230241                 | 0.02294939     |            |
|                                       | <i>HSD17B12</i> | -0.7582626                 | 0.04820844     |            |
|                                       | <i>SLC24A2</i>  | -0.9020196                 | 0.00547163     |            |
|                                       | <i>IQCH</i>     | -0.8417394                 | 0.01754025     |            |
|                                       | <i>TMEM144</i>  | -0.8672699                 | 0.01146243     |            |
|                                       | <i>SPECC1</i>   | -0.8187286                 | 0.02430777     |            |
|                                       | <i>IFRD1</i>    | -0.7802601                 | 0.03846707     |            |
|                                       | hsa-miR-744-3p  | <i>MSANTD3</i>             | -0.8639703     | 0.01216559 |
|                                       |                 | <i>SYNC</i>                | -0.7652601     | 0.0449782  |
| <i>SETMAR</i>                         |                 | -0.8711499                 | 0.01066621     |            |
| <i>E2F3</i>                           |                 | -0.8299849                 | 0.02084133     |            |
| <i>PSMC3IP</i>                        |                 | -0.917823                  | 0.0035558      |            |
| <i>CDCA8</i>                          |                 | -0.8563841                 | 0.013874       |            |
| <i>C1orf112</i>                       |                 | -0.8987079                 | 0.00593486     |            |
| <i>BUB1</i>                           |                 | -0.7790372                 | 0.03897688     |            |
| <i>PAPPA</i>                          |                 | -0.7679027                 | 0.04379029     |            |
| <i>HCN4</i>                           |                 | -0.8688884                 | 0.01112629     |            |
| gga-miR-128-3p                        | <i>E2F3</i>     | -0.7955461                 | 0.03240694     |            |
|                                       | <i>HMGA2</i>    | -0.9049274                 | 0.00508284     |            |
|                                       | <i>E2F7</i>     | -0.8630111                 | 0.01237452     |            |
| gga-miR-148a-3p                       | <i>E2F3</i>     | -0.7628172                 | 0.04609191     |            |
|                                       | <i>DGKI</i>     | -0.8344002                 | 0.01956348     |            |
| gga-miR-31-5p                         | <i>DGKI</i>     | -0.8344002                 | 0.01956348     |            |
| gga-miR-425-5p                        | <i>B3GALT5</i>  | -0.8144547                 | 0.02570314     |            |
| <b>Later-phase upregulation group</b> |                 |                            |                |            |
| <b>miRNA</b>                          | <b>MM</b>       | <b>P-value</b>             |                |            |
| hsa-miR-3617-3p                       | -0.67           | 0.0016                     |                |            |
| hsa-miR-4440                          | -0.6            | 0.006                      |                |            |
| hsa-miR-6847-5p                       | -0.63           | 0.004                      |                |            |

- Dataset S1.** Photographs and statistics of histological skin sections in studied species.
- Dataset S2.** Metabolomics identification.
- Dataset S3.** Orthologous genes across studied species.
- Dataset S4.** Genes of early-phase up-regulation and associated functional enrichments.
- Dataset S5.** Genes of later-phase up-regulation and associated functional enrichments.
- Dataset S6.** Genes that gradually increased in expression and associated functional enrichments.
- Dataset S7.** Genes that gradually decreased in expression and associated functional enrichments.
- Dataset S8.** Conservative and novel miRNAs predicted in studied frogs.
- Dataset S9.** Normalized expression levels of miRNAs in studied frogs.
- Dataset S10.** List of PSGs and associated functional enrichments.
